# Supplementary material
Source: Elsevier journal article supplement (https://www.sciencedirect.com/science/article/pii/S2007505716300783)
Supplement: mmc1 [file S2007505716300783:mmc1.doc]

**Anexo I**

Escala de empatía médica de Jefferson, versión adaptada.

**INSTRUCCIONES:**

**A) Datos personales del participante.** Llene por completo los siguientes reactivos.

| **1. Edad: ___** años | **2. Sexo:** F___ M___ | **3. Año escolar: ___** |
| --- | --- | --- |

| **4. Lugar de Procedencia:** Mérida ___ Interior del estado ___ Otro ___ (Especifique: ____________) |
| --- |
| **5. Tipo de escuela donde efectuó sus estudios de bachillerato:** Privada ___ Pública ___ |
| **6. Religión:** Católica ___ Otra ___ (Especifique: ____________) Sin religión ___ |
| **7. ¿Qué especialidad le gustaría estudiar? ______________________** |

B) A la derecha de cada oración, indique el grado de acuerdo o desacuerdo empleando la siguiente escala:

| **1** | **2** | **3** | **4** | **5** | **6** | **7** |
| --- | --- | --- | --- | --- | --- | --- |
| Totalmente en desacuerdo |  |  |  |  |  | Totalmente de acuerdo |

| 1. Comprender los sentimientos del paciente y sus familiares es irrelevante para el tratamiento médico. |  |
| --- | --- |
| 1. El paciente se sienten mejor cuando comprendo sus sentimientos. |  |
| 1. Es difícil ver las cosas desde la perspectiva del paciente. |  |
| 1. El lenguaje no verbal es tan importante como la comunicación verbal en la relación médico-paciente. |  |
| 1. Tengo un buen sentido del humor que contribuye a un mejor resultado clínico. |  |
| 1. Es imposible ver las cosas desde la perspectiva del paciente, pues cada quien es diferente. |  |
| 1. Evito poner atención a las emociones del paciente durante la entrevista e historia clínica. |  |
| 1. Conocer las expectativas personales del paciente es irrelevante para la efectividad del tratamiento. |  |
| 1. Trato de ponerme en el lugar de mis pacientes cuando los estoy atendiendo. |  |
| 1. Comprender los sentimientos del paciente le brinda una sensación de validez que es terapéutica por sí misma. |  |
| 1. Las enfermedades sólo se curan con tratamiento médico; los lazos afectivos con el paciente no tienen un valor significativo en este contexto. |  |
| 1. Preguntar qué sucede en la vida de los pacientes no permite entender el origen de sus molestias físicas. |  |
| 1. Trato de entender qué ocurre en la mente del paciente poniendo atención a su comunicación no verbal y lenguaje corporal. |  |
| 1. Las emociones no tienen lugar en el tratamiento de una enfermedad médica. |  |
| 1. La empatía es una habilidad terapéutica sin la cual mi éxito como médico puede estar limitada. |  |
| 1. En la relación médico-paciente, es importante comprender el estado emocional del paciente y sus familiares. |  |
| 1. Trato de pensar como mis pacientes para poder darles un mejor cuidado. |  |
| 1. No me permito ser afectado por las intensas relaciones sentimentales entre el paciente con sus familias. |  |
| 1. No disfruto leer literatura no médica o de arte. |  |
| 1. La empatía es un factor terapéutico en el tratamiento médico. |  |

**Anexo II**

Escala de empatía médica de Jefferson, versión original en español.

INSTRUCCIONES: (EN RELACION CON EL TRABAJO MEDICO) Indique su grado de acuerdo o desacuerdo en cada una de las siguientes oraciones escribiendo el número apropiado en la línea que se encuentra antes de cada oración.

Utilice la siguiente escala de 7 puntos (un mayor número de escala indica un mayor acuerdo):

| **1** | **2** | **3** | **4** | **5** | **6** | **7** |
| --- | --- | --- | --- | --- | --- | --- |
| Totalmente en desacuerdo |  |  |  |  |  | Totalmente de acuerdo |

| 1. | Mi comprensión de los sentimientos de mi paciente y sus familiares es un factor irrelevante en el tratamiento médico. | 1 | 2 | 3 | 4 | 5 | 6 | 7 |  | |
| --- | --- | --- | --- | --- | --- | --- | --- | --- | --- | --- |
| 2. | Mis pacientes se sienten mejor cuando yo comprendo sus sentimientos. | 1 | 2 | 3 | 4 | 5 | 6 | 7 |  | |
| 3. | Es difícil para mí ver las cosas desde la perspectiva de mis pacientes. | 1 | 2 | 3 | 4 | 5 | 6 | 7 |  | |
| 4. | Considero que el lenguaje no verbal de mi paciente es tan importante como la comunicación verbal en la relación médico-paciente. |  |  |  |  |  |  |  |  | |
| 5. | Tengo un buen sentido del humor que creo que contribuye a un mejor resultado clínico. | 1 | 2 | 3 | 4 | 5 | 6 | 7 |  | |
| 6. | La gente es diferente, lo que me hace imposible ver las cosas de la perspectiva de mi paciente. | 1 | 2 | 3 | 4 | 5 | 6 | 7 |  | |
| 7. | Trato de no poner atención a las emociones de mis pacientes durante la entrevista e historia clínica. | 1 | 2 | 3 | 4 | 5 | 6 | 7 |  | |
| 8. | La atención a las experiencias personales de mis pacientes es irrelevante para la efectividad del tratamiento. | 1 | 2 | 3 | 4 | 5 | 6 | 7 |  | |
| 9. | Trato de ponerme en el lugar de mis pacientes cuando los estoy atendiendo. | 1 | 2 | 3 | 4 | 5 | 6 | 7 |  | |
| 10. | Mi comprensión de los sentimientos de mis pacientes les da una sensación de validez que es terapéutica por sí misma. | 1 | 2 | 3 | 4 | 5 | 6 | 7 |  | |
| 11. | Las enfermedades de mis pacientes sólo pueden ser curadas con tratamiento médico; por lo tanto, los lazos afectivos con mis pacientes no tienen un valor significativo en este contexto. | 1 | 2 | 3 | 4 | 5 | 6 | 7 |  | |
| 12. | Considero que preguntarles a mis pacientes de lo que está sucediendo en sus vidas es un factor sin importancia para entender sus molestias físicas. | 1 | 2 | 3 | 4 | 5 | 6 | 7 |  | |
| 13. | Trato de entender que está pasando en la mente de mis pacientes poniendo atención a su comunicación no verbal y lenguaje corporal. | 1 | 2 | 3 | 4 | 5 | 6 | 7 |  | |
| 14. | Creo que las emociones no tienen lugar en el tratamiento de una enfermedad médica. | 1 | 2 | 3 | 4 | 5 | 6 | 7 |  | |
| 15. | La empatía es una habilidad terapéutica sin la cual mi éxito como médico puede estar limitada. | 1 | 2 | 3 | 4 | 5 | 6 | 7 |  | |
| 16. | Un componente importante de la relación con mis pacientes es mi comprensión de su estado emocional y el de sus familias. | 1 | 2 | 3 | 4 | 5 | 6 | 7 |  | |
| 17. | Trato de pensar como mis pacientes para poder darles un mejor cuidado. | 1 | 2 | 3 | 4 | 5 | 6 | 7 |  | |
| 18. | No me permito ser afectado por las intensas relaciones sentimentales entre mis pacientes con sus familias. | 1 | 2 | 3 | 4 | 5 | 6 | 7 |  | |
| 19. | No disfruto leer literatura no médica o arte. | 1 | 2 | 3 | 4 | 5 | 6 | 7 |  | |
| 20. | Creo que la empatía es un factor terapéutico en el tratamiento médico. | 1 | 2 | 3 | 4 | 5 | 6 | 7 |  |  |
